# Supplementary material
Source: PubMed Central journal article supplement (PMC5710193)
Supplement: jamaoncol-3-1520-s002.pdf [file jamaoncol-3-1520-s002.pdf]

## Supplementary Online Content

Suntharalingam M, Winter K, Ilson D, et al. Effect of the addition of cetuximab to paclitaxel, cisplatin, and radiation therapy for patients With esophageal cancer: The NRG Oncology RTOG 0436 phase 3 randomized clinical trial [published online July 6, 2017]. *JAMA Oncol*. doi:10.1001/jamaoncol.2017.1598

**eTable 1a.** Radiation Therapy Planning Review

**eTable 1b.** Chemotherapy/Targeted Agent Review

**eTable 2.** Reported Surgery in Follow-up for All Patients

**eFigure.** Overall Survival by Clinical Disease Status (n=303)

This supplementary material has been provided by the authors to give readers additional information about their work.

### **Initial Report of NRG Oncology RTOG 0436: A Phase III Trial Evaluating the Addition of Cetuximab to Paclitaxel, Cisplatin, and Radiation for Patients with Esophageal Cancer**

Mohan Suntharalingam, MD, MBA<sup>1</sup>, Kathryn Winter, MS<sup>2</sup>, David Ilson, MD, PhD<sup>3</sup>, Adam P. Dicker, MD, PhD<sup>4</sup>, Lisa Kachnic, MD<sup>5</sup>, André Konski, MD<sup>6</sup>, A. Bapsi Chakravarthy, MD<sup>5</sup>, Christopher J. Anker, MD<sup>7</sup>, Harish Thakrar, MD<sup>8</sup>, Naomi Horiba, MD<sup>9</sup>, Ajay Dubey, MD, MPH, MBA<sup>10</sup>, Joel S. Greenberger, MD<sup>11</sup>, Adam Raben, MD<sup>12</sup>, Jeffrey Giguere, MD<sup>13</sup>, Kevin Roof, MD<sup>14</sup>, Gregory Videtic, MD<sup>15</sup>, Jondavid Pollock, MD<sup>16</sup>, Howard Safran, MD<sup>17</sup>, Christopher H. Crane, MD<sup>18</sup>

<sup>1</sup> University of Maryland Medical System, Baltimore, MD

<sup>2</sup> NRG Oncology Statistics and Data Management Center, Philadelphia, PA

<sup>3</sup> Memorial Sloan-Kettering Cancer Center, New York City, NY

<sup>4</sup> Thomas Jefferson University Hospital, Philadelphia, PA

<sup>5</sup> Vanderbilt University Medical Center, Ingram Cancer Center, Nashville, TN

<sup>6</sup> The Chester County Hospital, West Chester, PA

<sup>7</sup> Huntsman Cancer Hospital, University of Utah, Salt Lake City, Utah

<sup>8</sup> John H. Stroger, Jr. Hospital of Cook County MBCCOP, Chicago, IL

<sup>9</sup> University of Maryland Medical System, Baltimore, MD (during trial), Food and Drug Administration, Bethesda, MD (current)

<sup>10</sup> USON- Texas Oncology, Bedford, TX

<sup>11</sup> UPMC-Shadyside Hospital, Pittsburgh, PA

<sup>12</sup> Christiana Care Health Services, Inc. CCOP Newark, DE,

<sup>13</sup> Greenville South Carolina CCOP, Greenville, SC

- <sup>14</sup> Southeast Cancer Control Consortium, Inc., CCOP, Winston Salem, NC  
<sup>15</sup> Cleveland Clinic, Cleveland, OH  
<sup>16</sup> The Schiffler Cancer Center, Wheeling, WV  
<sup>17</sup> Brown University Oncology Group, Providence, RI  
<sup>18</sup> University of Texas-MD Anderson Cancer Center, Houston, TX (during trial),  
Memorial Sloan-Kettering Cancer Center, New York City, NY (current)

**Corresponding author**

Mohan Suntharalingam, MD, MBA  
Department of Radiation Oncology  
The Marlene and Stewart Greenebaum Cancer Center  
The University of Maryland School of Medicine  
22 South Greene Street  
Baltimore MD, 21201  
Phone: 410-328-2324  
Fax: 410-328-6911  
[msuntha@umm.edu](mailto:msuntha@umm.edu)

## **Table of Contents**

### **eTables**

eTable 1a. Radiation Therapy Planning Review 4

eTable 1b. Chemotherapy/Targeted Agent Review 5

eTable 2. Reported Surgery in Follow-up for All Patients 6

### **eFigure**

eFigure 1. Overall Survival by Clinical Disease Status (n=303) 7

**eTable 1a. Radiation Therapy Planning Review**

|                                           | RT+Chemo+Cetuximab<br>(n=159) | RT+Chemo<br>(n=169) |
|-------------------------------------------|-------------------------------|---------------------|
| Tumor volume contouring score             | (n=159)                       | (n=169)             |
| Per protocol                              | 120 (75.5%)                   | 136 (80.5%)         |
| Acceptable variation                      | 18 (11.3%)                    | 12 (7.1%)           |
| Unacceptable variation                    | 9 (5.7%)                      | 7 (4.1%)            |
| Not evaluable                             | 12 (7.5%)                     | 14 (8.3%)           |
| Organs at risk contouring score           | (n=159)                       | (n=169)             |
| Per protocol                              | 135 (84.9%)                   | 141 (83.4%)         |
| Acceptable variation                      | 4 (2.5%)                      | 8 (4.7%)            |
| Unacceptable variation                    | 8 (5.0%)                      | 6 (3.6%)            |
| Not evaluable                             | 12 (7.5%)                     | 14 (8.3%)           |
| Tumor volume dose volume analysis score   | (n=159)                       | (n=169)             |
| Per protocol                              | 109 (68.6%)                   | 121 (71.6%)         |
| Acceptable variation                      | 15 (9.4%)                     | 23 (13.6%)          |
| Unacceptable variation                    | 23 (14.5%)                    | 7 (4.1%)            |
| Not evaluable                             | 12 (7.5%)                     | 18 (10.7%)          |
| Organs at risk dose volume analysis score | (n=159)                       | (n=169)             |
| Per protocol                              | 36 (22.6%)                    | 28 (16.6%)          |
| Acceptable variation                      | 111 (69.8%)                   | 123 (72.8%)         |
| Unacceptable variation                    | 0 (0.0%)                      | 0 (0.0%)            |
| Not evaluable                             | 12 (7.5%)                     | 18 (10.7%)          |

**eTable 1b. Chemotherapy/Targeted Agent Review**

|                                                                                         | RT+Chemo+Cetuximab<br>(n=159) | RT+Chemo<br>(n=169) |
|-----------------------------------------------------------------------------------------|-------------------------------|---------------------|
| Per protocol                                                                            | 109 (68.6%)                   | 127<br>(75.1%)      |
| Not per protocol                                                                        | 44 (27.7%)                    | 41 (24.3%)          |
| Not evaluable                                                                           | 6 (3.8%)                      | 1 (0.6%)            |
| Per protocol, no modifications or delays                                                | 66 (41.5%)                    | 83 (49.1%)          |
| Per protocol, modifications and/or delays                                               | 43 (27.0%)                    | 44 (26.0%)          |
| Not per protocol, modifications and/or delays<br>with $\geq$ 80% of protocol dose given | 26 (16.4%)                    | 25 (14.8%)          |
| Not per protocol, modifications and/or delays<br>with $<$ 80% of protocol dose given    | 18 (11.3%)                    | 16 (9.5%)           |
| Not evaluable                                                                           | 6 (3.8%)                      | 1 (0.6%)            |
| Dose modified/delayed due to AEs                                                        | 82 (51.6%)                    | 86 (50.9%)          |
| Treatment terminated due to AEs                                                         | 40 (25.2%)                    | 25 (14.8%)          |

**eTable 2. Reported Surgery in Follow-up for All Patients**

|                    | No<br>(n=284) | Yes<br>(n=44)           | Total<br>(n=328) |
|--------------------|---------------|-------------------------|------------------|
| RX                 |               |                         |                  |
| RT+Chemo+Cetuximab | 134 (47.2%)   | 25 <sup>†</sup> (56.8%) | 159 (48.5%)      |
| RT+Chemo           | 150 (52.8%)   | 19 <sup>‡</sup> (43.2%) | 169 (51.5%)      |

<sup>†</sup>Residual=13; Recurrent=12

<sup>‡</sup>Residual=13; Recurrent=6

**eFigure 1. Overall Survival by Clinical Disease Status (n=303)**

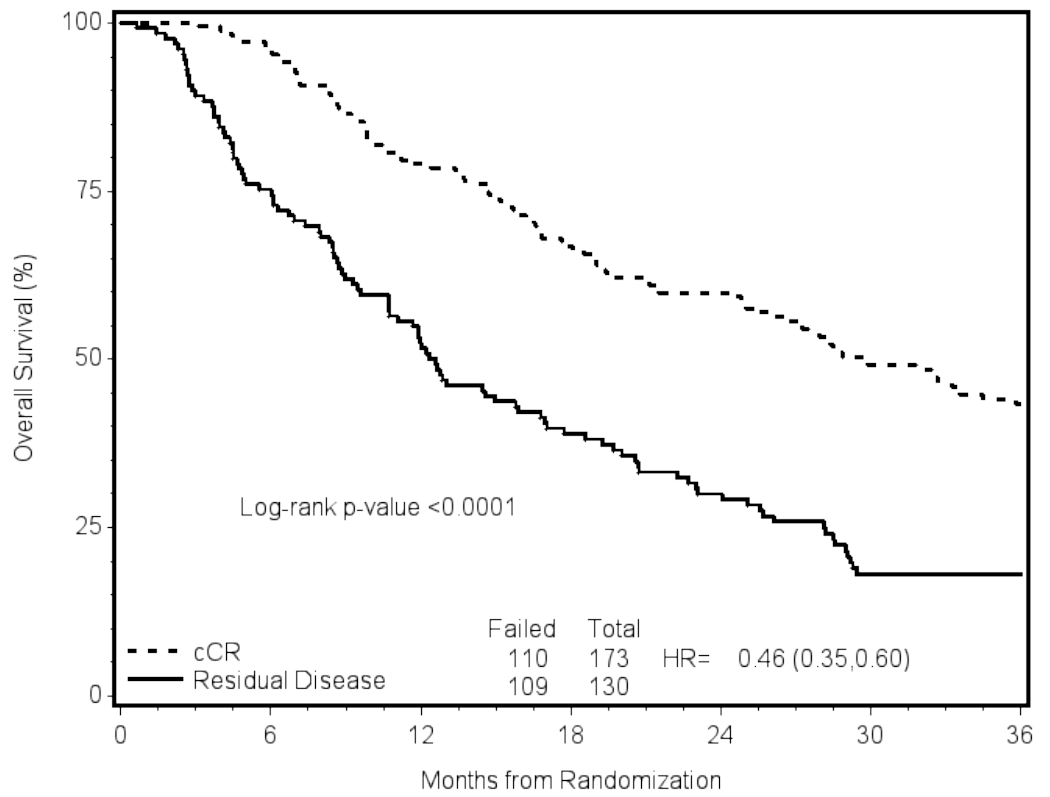

| Patients at Risk | 0   | 6   | 12  | 18  | 24  | 30 | 36 |
|------------------|-----|-----|-----|-----|-----|----|----|
| cCR              | 173 | 165 | 136 | 115 | 102 | 82 | 58 |
| Residual Disease | 130 | 97  | 65  | 48  | 36  | 20 | 19 |
